# Supplementary material for: GD2-directed bispecific trifunctional antibody outperforms dinutuximab beta in a murine model for aggressive metastasized neuroblastoma
Source: PubMed Central journal article supplement — J Immunother Cancer. 2021 Jul 20;9(7):e002923. doi: 10.1136/jitc-2021-002923 (PMC8292814; doi:10.1136/jitc-2021-002923), 2021-07-20
Supplement: jitc-2021-002923supp001.pdf [file jitc-2021-002923supp001.pdf]

## Graphical abstract

# GD2-directed bispecific trifunctional antibody outperforms dinutuximab beta in a murine model for aggressive metastasized neuroblastoma

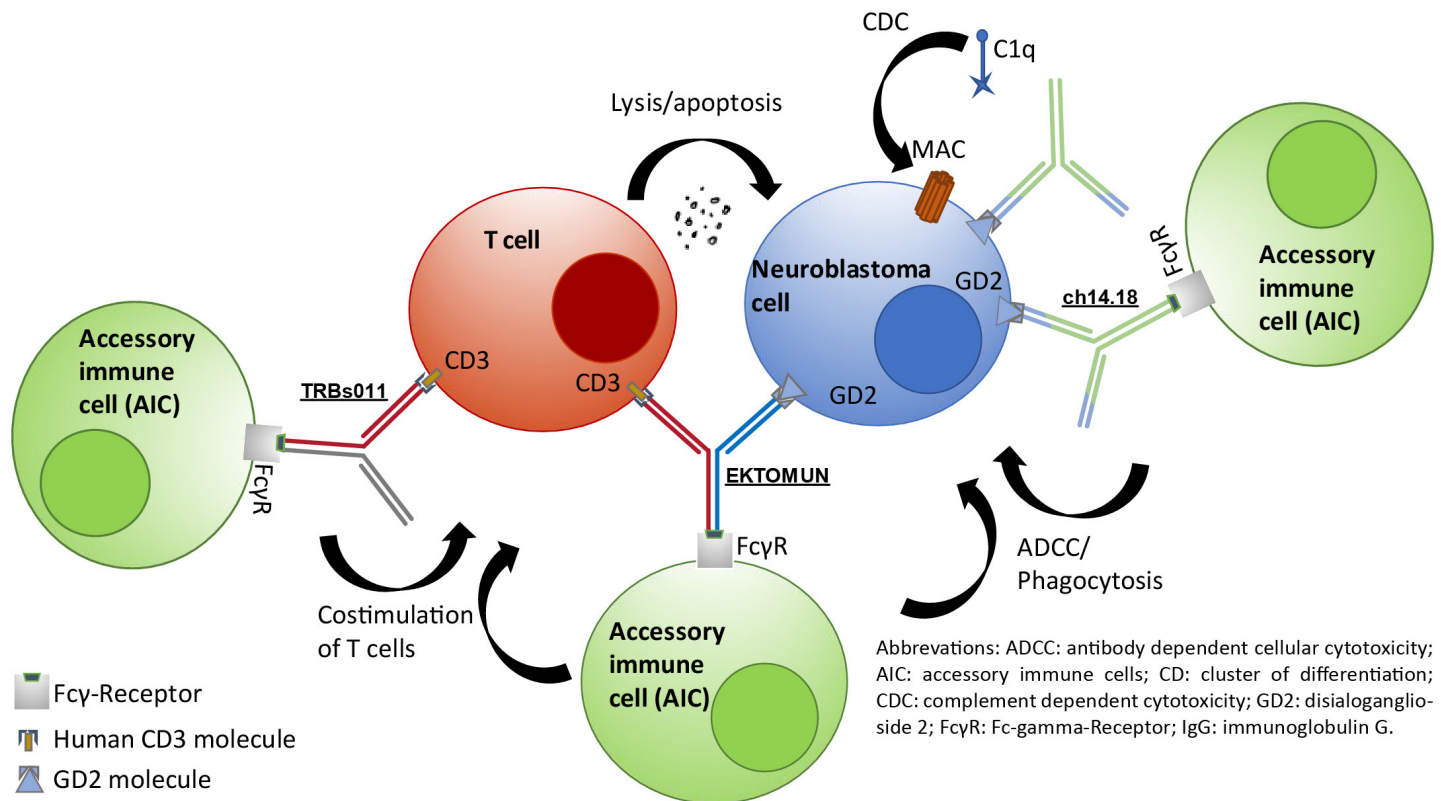

**Authors:** Felix Zirngibl, Sara M Ivasko, Laura Grunewald, Anika Klaus, Silke Schwiebert, Peter Ruf, Horst Lindhofer, Kathy Astrahansteff, Lena Andersch, Johannes H Schulte, Holger N Lode, Angelika Eggert, Kathleen Anders, Patrick Hundsdörfer and Annette Künkele

**Correspondance:** felix.zirngibl@charite.de

**In Brief:** T cells are redirected to and activated at GD2 positive neuroblastoma cells by bispecific trifunctional antibody EKTOMUN. In addition, the Fc-region of bispecific trifunctional antibodies interacts simultaneously or subsequently with Fc-gamma receptor positive accessory immune cells such as natural killer cells, macrophages or dendritic cells and thus provide a co-stimulatory signal to activate T cells. In this way, tumor cells can be effectively eradicated by a combined action of T cells and accessory immune cells exploiting different mechanisms, such as antibody dependent cellular cytotoxicity (ADCC), phagocytosis, or perforin/granzyme-mediated lysis and apoptosis induction. The primary mode of action of the monoclonal antibody ch14.18 is either mediating ADCC or inducing the formation of a membrane attack complex (MAC) via complement activation.
